# Supplementary material for: Submicron aerosol composition in the world's most polluted megacity: the Delhi Aerosol Supersite study
Source: Copernicus journal article supplement (doi:10.5194/acp-19-6843-2019), 2019-05-22
Supplement: Supplementary file 1 [file acp-19-6843-2019-supplement.pdf]

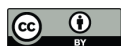

*Supplement of*

## **Submicron aerosol composition in the world's most polluted megacity: the Delhi Aerosol Supersite study**

**Shahzad Gani et al.**

*Correspondence to:* Joshua S. Apte ([jsapte@utexas.edu](mailto:jsapte@utexas.edu)) and Lea Hildebrandt Ruiz ([lhr@che.utexas.edu](mailto:lhr@che.utexas.edu))

The copyright of individual parts of the supplement might differ from the CC BY 4.0 License.

**Table S1.** Summary annual (2017) and campaign (January 2017 to April 2018) statistics including arithmetic mean (AM), geometric mean (GM), geometric standard deviation (GSD) and synthetic AM for hourly data of various species. Synthetic AM was calculated using the averages of the six 2-month periods (January-February through November-December). PM<sub>2.5</sub> data from R.K. Puram (DPCC) with only partial data for April-2017. Composition-based estimate of PM<sub>1</sub> (C-PM<sub>1</sub>) = BC + NR-PM<sub>1</sub>.

|                    | Annual (2017) |     |     |              | Campaign (Jan-2017 to Apr-2017) |     |     |              |
|--------------------|---------------|-----|-----|--------------|---------------------------------|-----|-----|--------------|
|                    | AM            | GM  | GSD | Synthetic AM | AM                              | GM  | GSD | Synthetic AM |
| PM <sub>2.5</sub>  | 140           | 104 | 2.2 | 139          | 147                             | 113 | 2.2 | 145          |
| C-PM <sub>1</sub>  | 108           | 80  | 2.2 | 115          | 125                             | 93  | 2.3 | 117          |
| NR-PM <sub>1</sub> | 84            | 59  | 2.3 | 101          | 101                             | 70  | 2.4 | 103          |
| Org                | 49            | 33  | 2.5 | 60           | 60                              | 41  | 2.5 | 62           |
| Chl                | 5.8           | 1.0 | 6.5 | 7.9          | 9.0                             | 1.6 | 7.3 | 8.5          |
| NH <sub>4</sub>    | 8.8           | 6.0 | 2.4 | 10           | 10                              | 6.6 | 2.6 | 10           |
| NO <sub>3</sub>    | 8.5           | 4.4 | 3.3 | 11           | 11                              | 5.6 | 3.4 | 11           |
| SO <sub>4</sub>    | 12            | 9.6 | 1.9 | 12           | 12                              | 9.5 | 1.9 | 11           |
| BC                 | 12            | 8.9 | 2.3 | 12           | 12                              | 8.5 | 2.3 | 11           |

**Table S2.** Relative ionization efficiency (RIE) for ammonium and sulfate and response factor for nitrate for the two periods of this study.

|                                                 | NH <sub>4</sub> RIE | SO <sub>4</sub> RIE | NO <sub>3</sub> RF     |
|-------------------------------------------------|---------------------|---------------------|------------------------|
| Jan-Sep 2017 (average)                          | 7.07                | 1.04                | 5.09×10 <sup>-11</sup> |
| Dec-Apr 2018 (based on calibration in Jan 2018) | 9.44                | 1.37                | 5.27×10 <sup>-11</sup> |

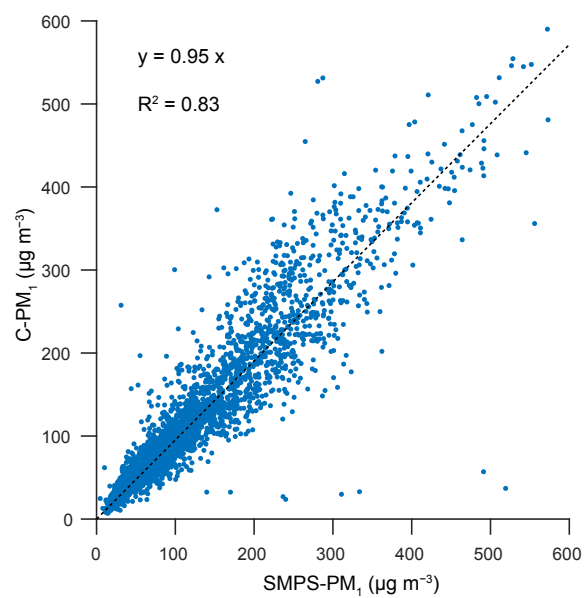

**Figure S1.** Scatter plot between C-PM<sub>1</sub> (Composition-PM<sub>1</sub> = NR-PM<sub>1</sub> + BC) and SMPS-PM<sub>1</sub> (PM<sub>1</sub> mass concentration estimated using PSD and assuming a density of 1.6 g cm<sup>-3</sup>).



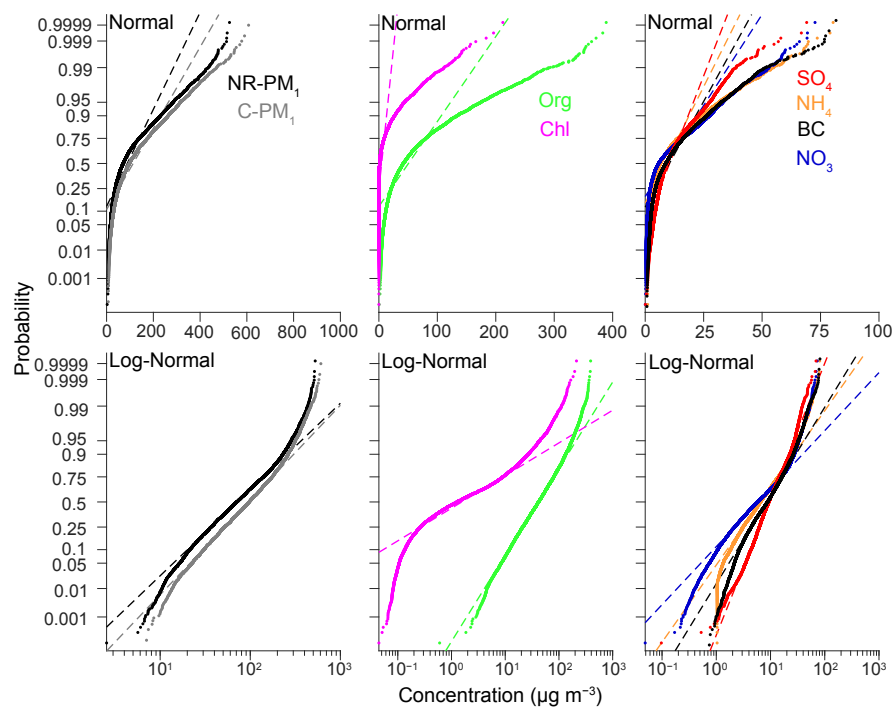

**Figure S2.** Probability plots for NR-PM<sub>1</sub>, C-PM<sub>1</sub>, Org, Chl, SO<sub>4</sub>, NH<sub>4</sub>, BC and NO<sub>3</sub> assuming normal and log-normal distributions. The dashed line represents what a normally (1<sup>st</sup> row panels) or log-normally (2<sup>nd</sup> row panels) distributed data would look like. Composition-based estimate of PM<sub>1</sub> (C-PM<sub>1</sub>) = BC + NR-PM<sub>1</sub>.

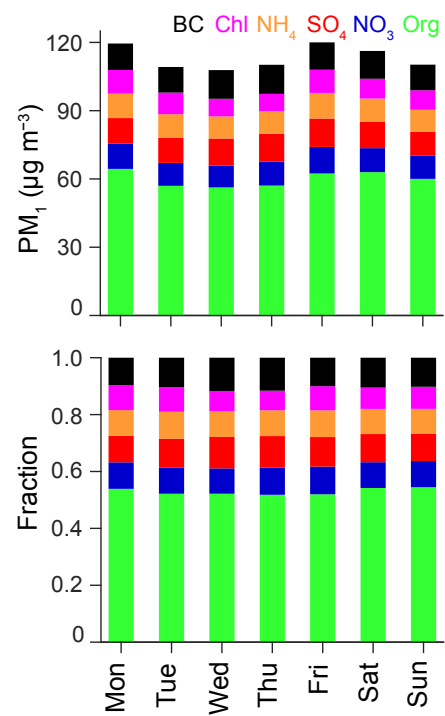

**Figure S3.** Average absolute and fractional composition of C-PM<sub>1</sub> (NR-PM<sub>1</sub> + BC) by day of week.

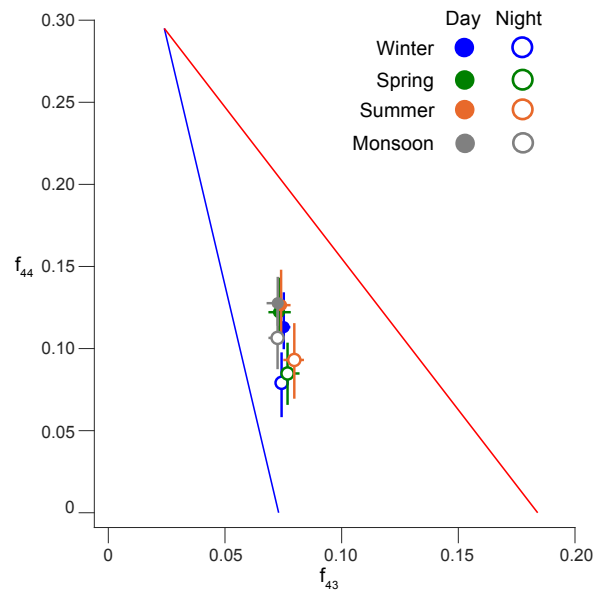

**Figure S4.** Average values for  $f_{43}$  and  $f_{44}$  included in the Ng et al. (2011) triangle plot. The horizontal and vertical lines are the 25<sup>th</sup> (left and bottom) and 75<sup>th</sup> percentiles (right and top).

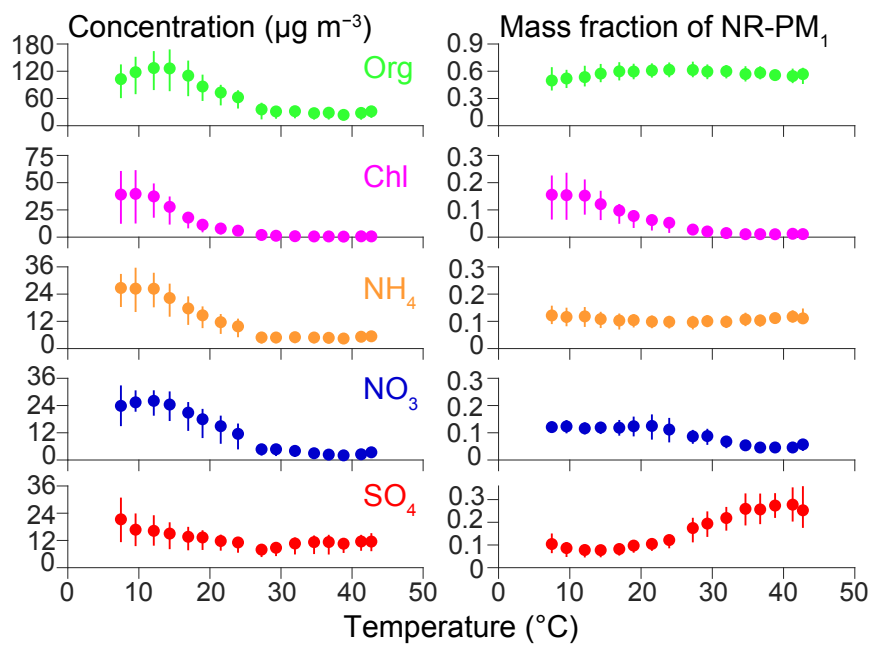

**Figure S5.** Variations of mass fractions of NR-PM<sub>1</sub> species as a function of temperature. The data were binned according to the temperature, and the vertical lines are the 25<sup>th</sup> (bottom) and 75<sup>th</sup> (top) percentiles.

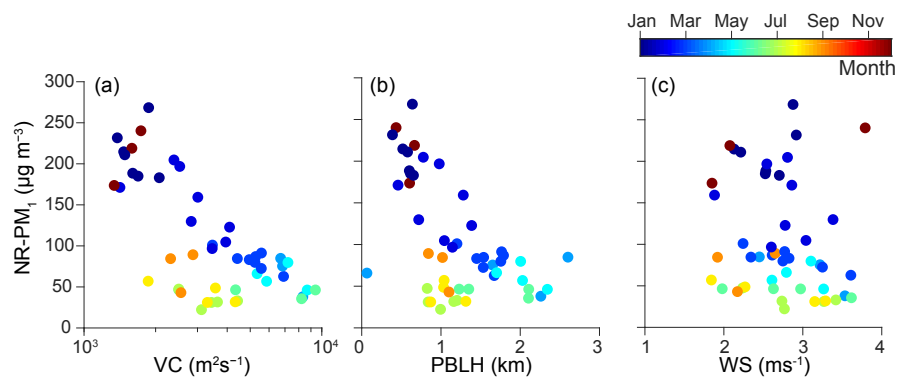

**Figure S6.** Variations of NR-PM<sub>1</sub> mass concentrations as a function of (a) ventilation coefficient, (b) planetary boundary layer height and (c) wind speed. Each scatter point is a weekly average and is color-coded with the month. Note that July to mid-September is the monsoon season.

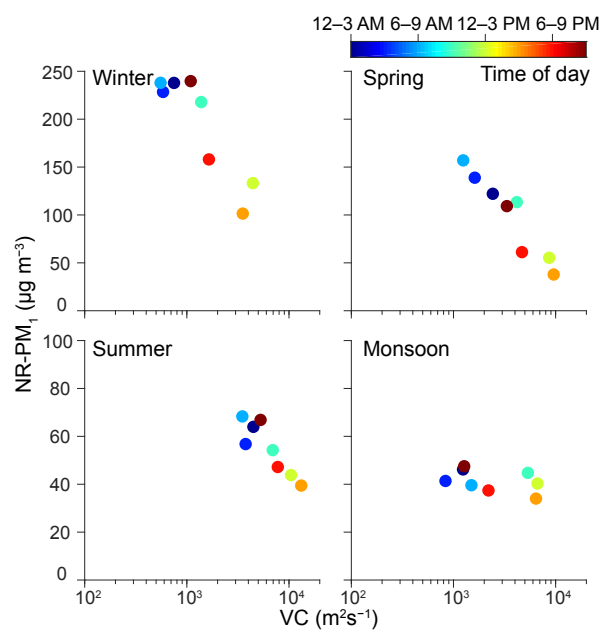

**Figure S7.** Variations of NR-PM<sub>1</sub> mass concentrations as a function of ventilation coefficient by season. Each scatter point is the average value for a day segment (color-coded).

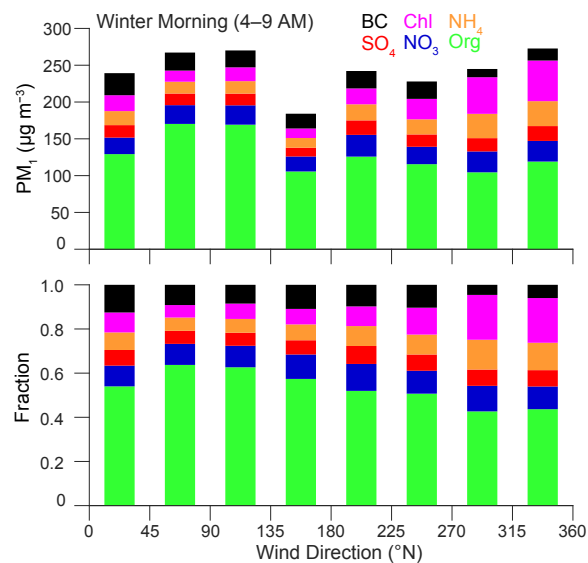

**Figure S8.** Average absolute and fractional composition of C-PM<sub>1</sub> (NR-PM<sub>1</sub> + BC) by wind direction for winter morning (4–9 AM)—when chloride concentrations were generally high. Chloride mass and fractional concentrations were higher when winds were from the northwest.

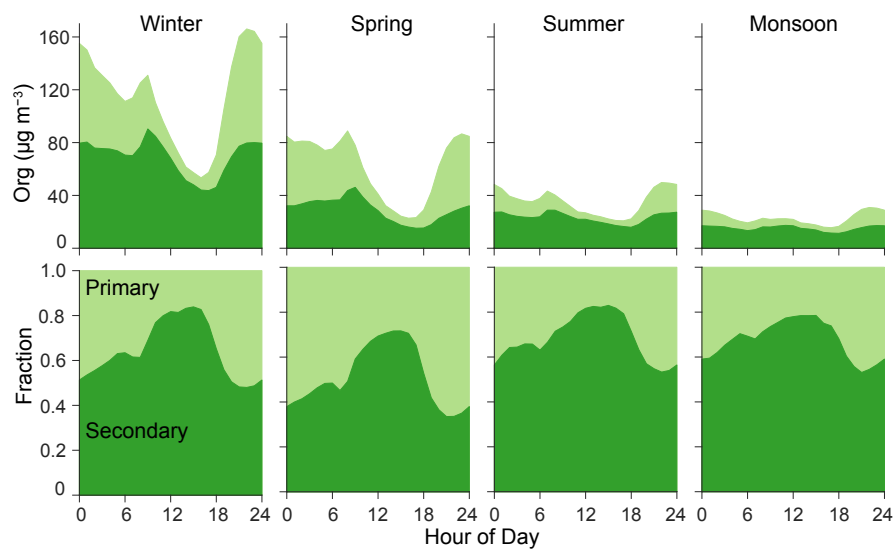

**Figure S9.** Average diurnal variation of mass concentrations and mass fractions of primary organic aerosol and secondary organic aerosol by season.



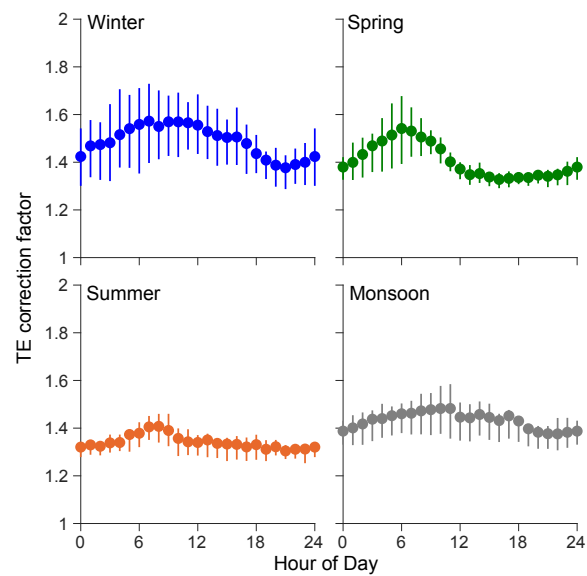

**Figure S10.** Diurnal variation in average transmission efficiency by season and time of day. The vertical lines are the 25<sup>th</sup> (bottom) and 75<sup>th</sup> (top) percentiles.

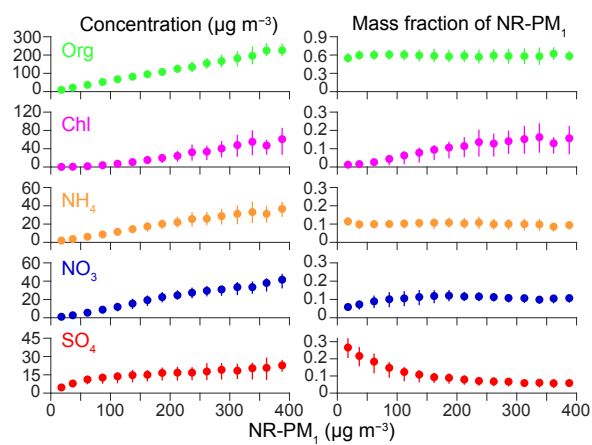

**Figure S11.** Variations of mass concentrations and mass fractions of NR-PM<sub>1</sub> species as a function of NR-PM<sub>1</sub> mass loadings. The data were binned according to the total NR-PM<sub>1</sub> mass, and the vertical lines are the 25<sup>th</sup> (bottom) and 75<sup>th</sup> (top) percentiles.

## References

Ng, N. L., Canagaratna, M. R., Jimenez, J. L., Chhabra, P. S., Seinfeld, J. H., and Worsnop, D. R.: Changes in organic aerosol composition with aging inferred from aerosol mass spectra, *Atmospheric Chemistry and Physics*, 11, 6465–6474, <https://doi.org/10.5194/acp-11-6465-2011>, 2011.
